# Supplementary material for: Bis-porphyrin copolymers covalently linked by pyridinium spacers obtained by electropolymerization from β-octaethylporphyrins and pyridyl-substituted porphyrins
Source: Royal Society of Chemistry journal article supplement (doi:10.1039/c1nj20790c), 2011-11-28
Supplement: c1nj20790c.pdf [file c1nj20790c.pdf]

**Electronic Supplementary Information**

**Bis-porphyrin copolymers covalently linked by pyridinium  
spacers obtained by electropolymerization from  $\beta$ -  
octaethylporphyrins and pyridyl-substituted porphyrins**

Yun Xia,<sup>a</sup> Delphine Schaming,<sup>a</sup> Rana Farha,<sup>b,c</sup> Michel Goldmann<sup>b,d</sup> and Laurent Ruhlmann<sup>\*a,e</sup>

<sup>a</sup> Laboratoire de Chimie Physique, UMR 8000 CNRS/Université Paris-Sud 11, Faculté des Sciences d'Orsay, Bâtiment 349, 91405 Orsay, France.

<sup>b</sup> Institut des NanoSciences de Paris, UMR 7588 CNRS/Université Paris 6, 4 place Jussieu, boîte courrier 840, 75252 Paris, France.

<sup>c</sup> Laboratoire d'Analyse et Contrôle des Systèmes Complexes, ECE Paris Ecole d'Ingénieurs, 37 quai de Grenelle, 75015 Paris, France.

<sup>d</sup> Université Paris Descartes, 45 rue des Saint Pères, 75006 Paris, France.

<sup>e</sup> Laboratoire d'Electrochimie et de Chimie-Physique du Corps Solide, UMR 7177 CNRS/Université de Strasbourg, 4 rue Blaise Pascal, 67081 Strasbourg, France.

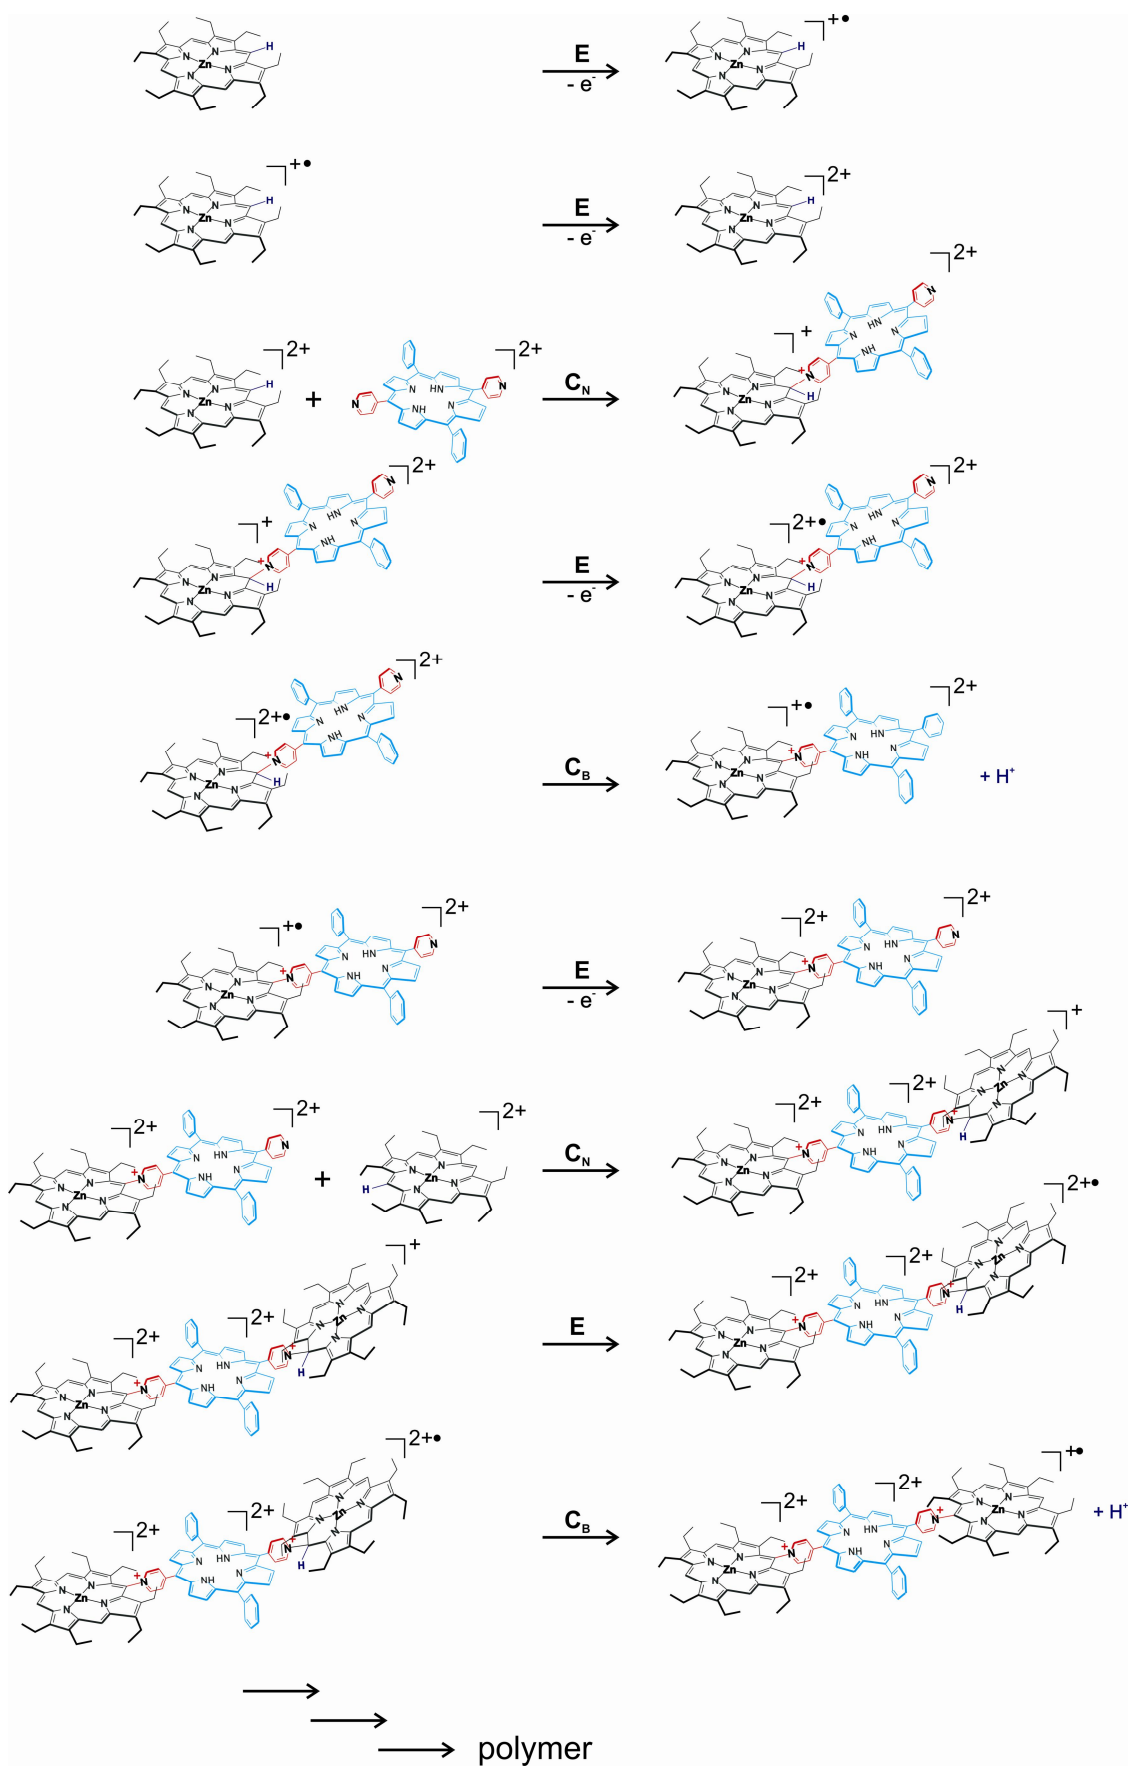

**Scheme S1.** E(EC<sub>N</sub>EC<sub>B</sub>)<sub>n</sub>E mechanism proposed for the electropolymerization of ZnOEP with trans-H<sub>2</sub>Py<sub>2</sub>Ph<sub>2</sub>P.

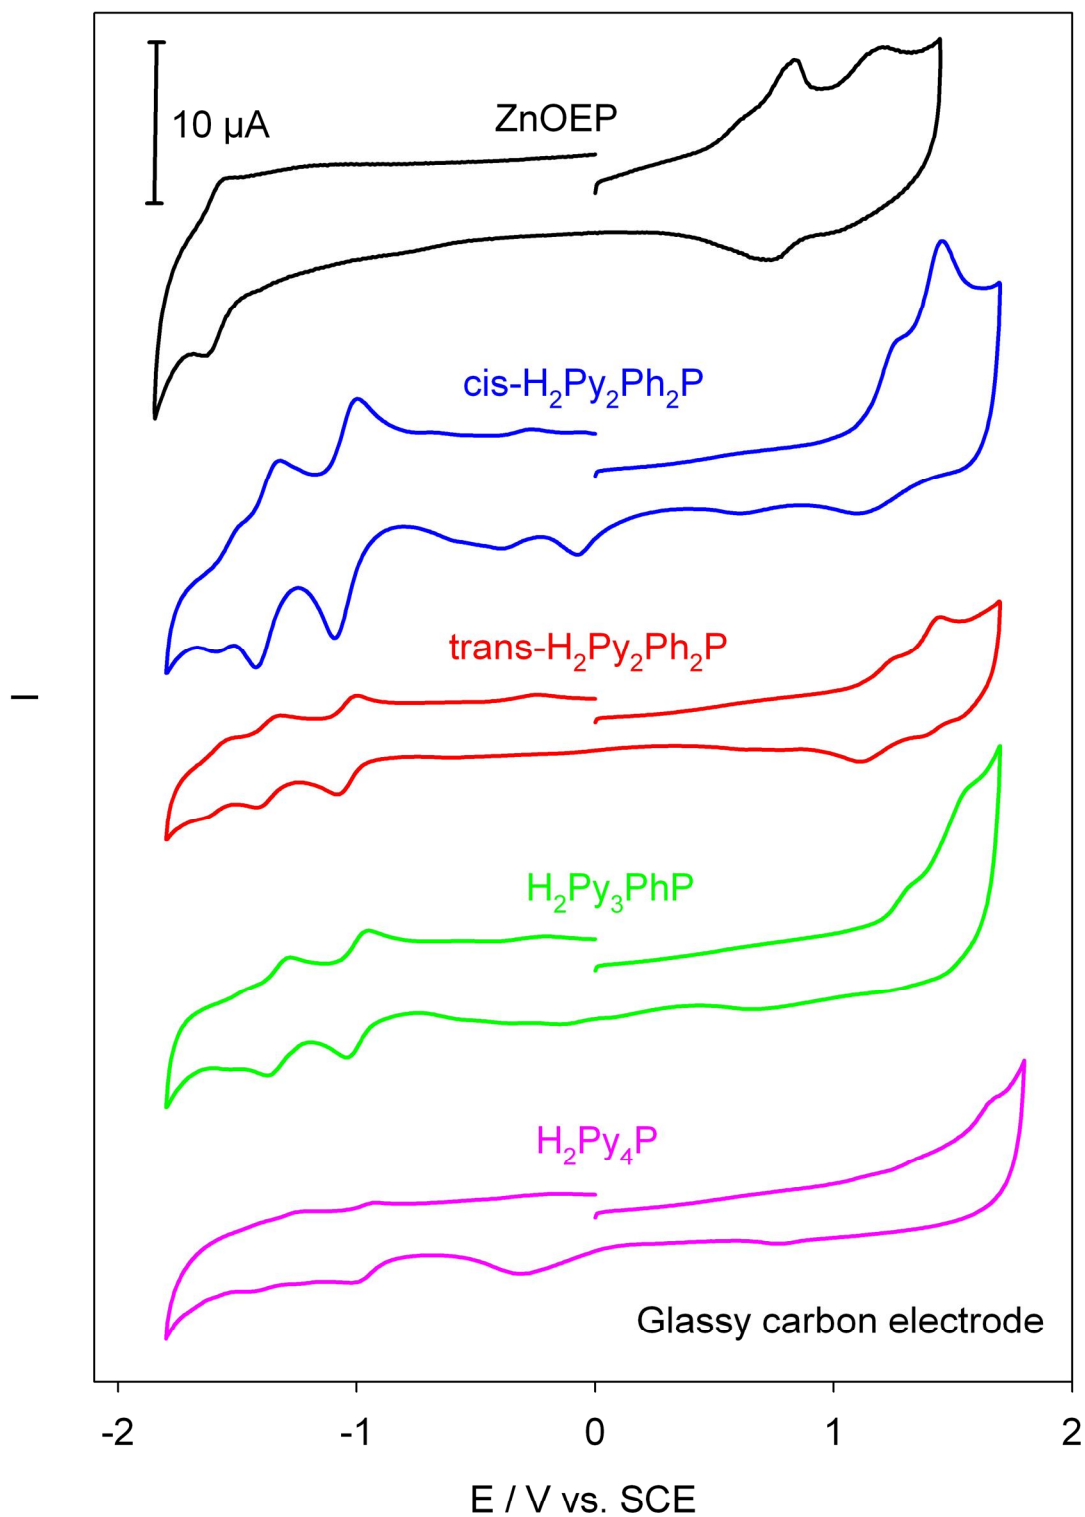

**Figure S1.** Cyclic voltammograms of ZnOEP, cis-H<sub>2</sub>Py<sub>2</sub>Ph<sub>2</sub>P, trans-H<sub>2</sub>Py<sub>2</sub>Ph<sub>2</sub>P, H<sub>2</sub>Py<sub>3</sub>PhP and H<sub>2</sub>Py<sub>4</sub>P in CH<sub>3</sub>CN/1,2-C<sub>2</sub>H<sub>4</sub>Cl<sub>2</sub> (1:4) with 0.1 M NEt<sub>4</sub>PF<sub>6</sub>.  $c = 0.25$  mM. Working electrode: glassy carbon; scan rate:  $0.1 \text{ V s}^{-1}$ .

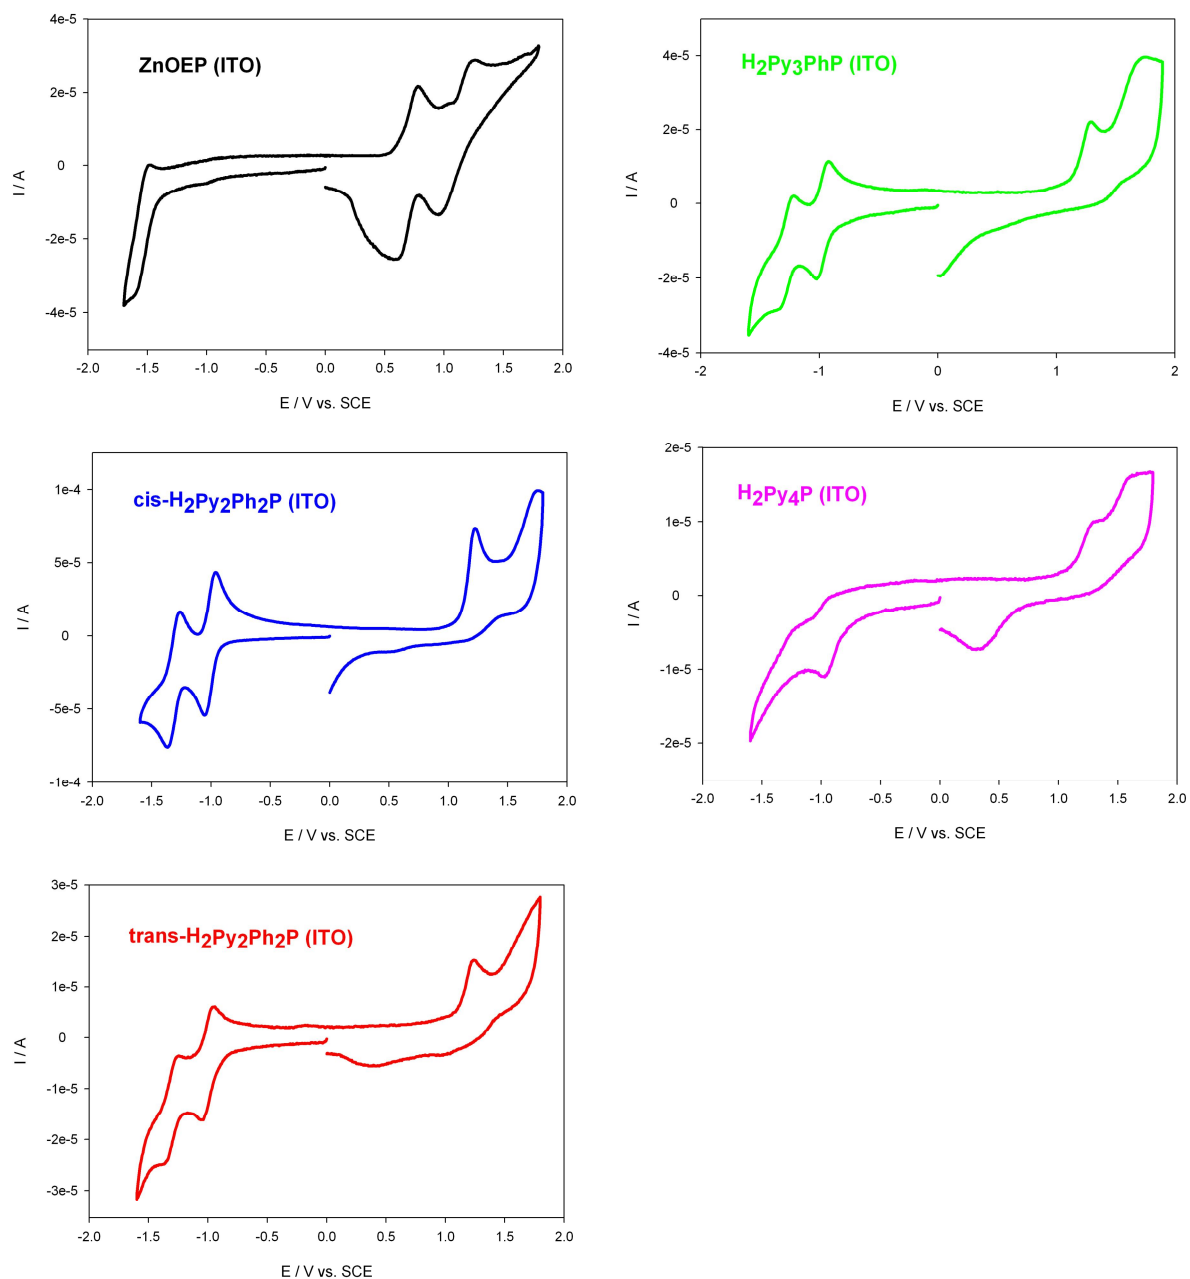

**Figure S2.** Cyclic voltammograms of ZnOEP, cis-H<sub>2</sub>Py<sub>2</sub>Ph<sub>2</sub>P, trans-H<sub>2</sub>Py<sub>2</sub>Ph<sub>2</sub>P, H<sub>2</sub>Py<sub>3</sub>PhP and H<sub>2</sub>Py<sub>4</sub>P in CH<sub>3</sub>CN/1,2-C<sub>2</sub>H<sub>4</sub>Cl<sub>2</sub> (1:4) with 0.1 M NEt<sub>4</sub>PF<sub>6</sub>. c = 0.25 mM. Working electrode: ITO; S = 1 cm<sup>2</sup>; scan rate: 0.1 V s<sup>-1</sup>.

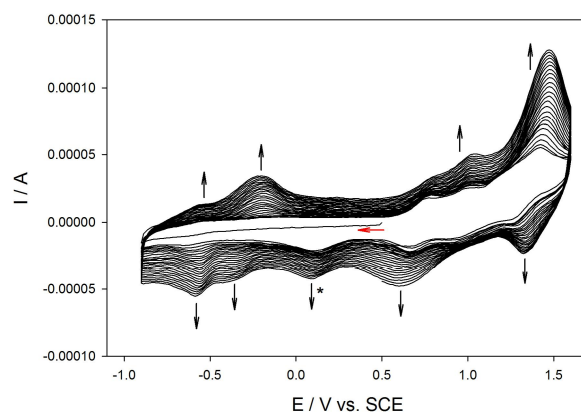

**Figure S3.** Cyclic voltammograms recorded during the electropolymerization of trans- $\text{H}_2\text{Py}_2\text{Ph}_2\text{P}$  in the presence of  $\text{ZnOEP}(\text{Cl})_2$  in  $\text{CH}_3\text{CN}/1,2\text{-C}_2\text{H}_4\text{Cl}_2$  (1:4) with 0.1 M  $\text{NEt}_4\text{PF}_6$ . working electrode: ITO;  $S = 1 \text{ cm}^2$ ; scan rate:  $0.1 \text{ V s}^{-1}$ .

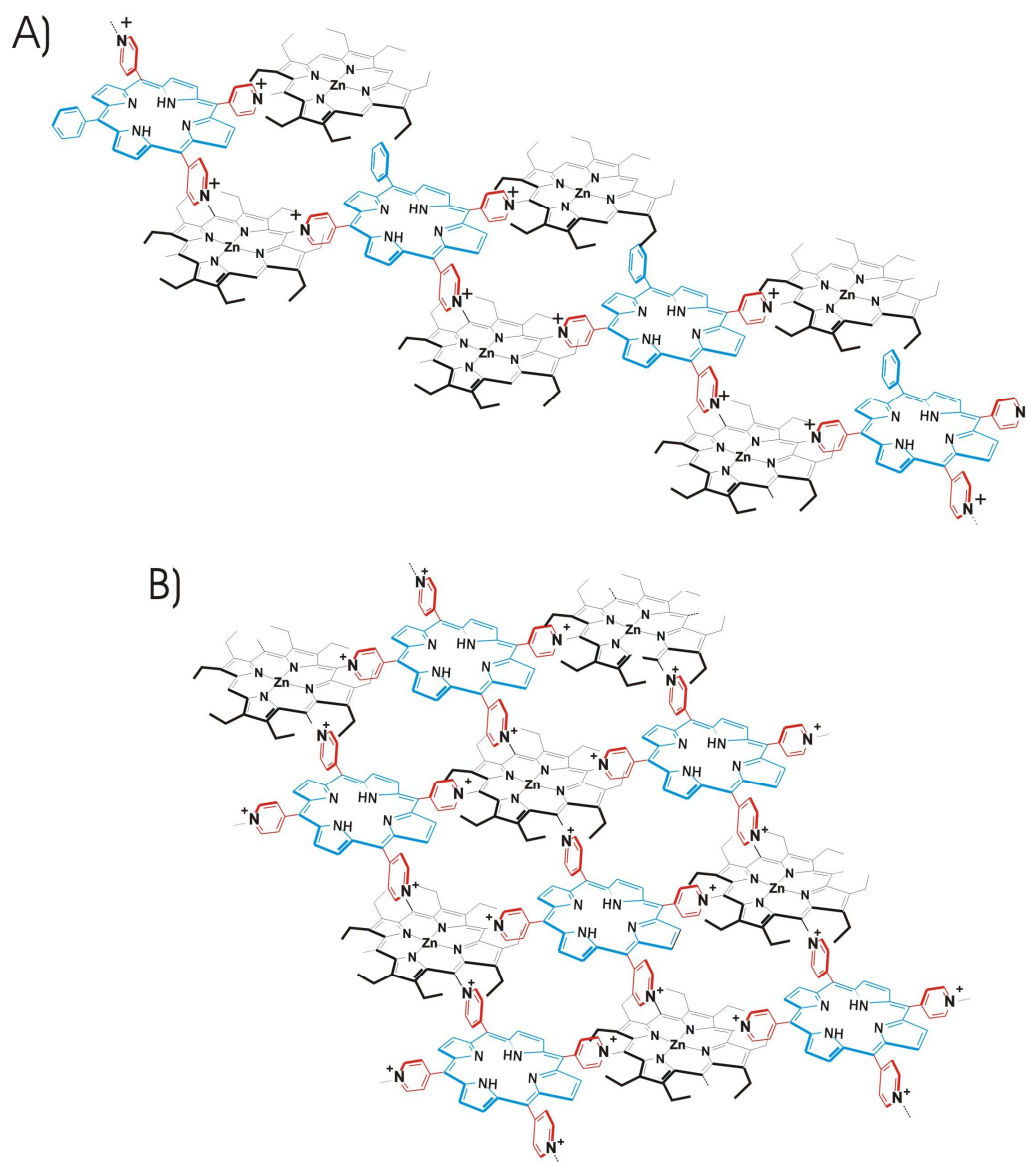

**Scheme S2.** Tentative representation of copolymers: (A) poly- $H_2Py_3PhP-ZnOEP$  and (B) poly- $H_2Py_4P-ZnOEP$ .

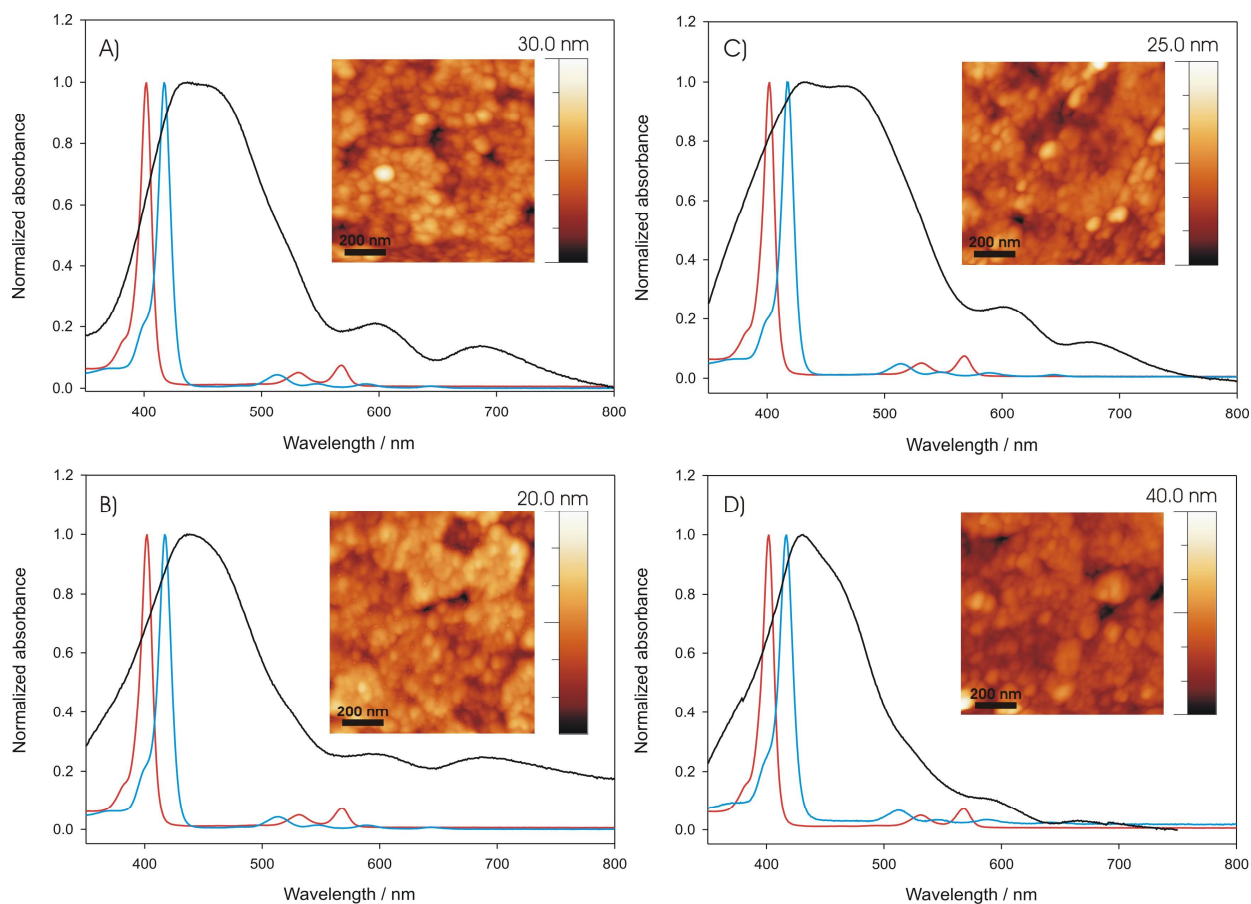

**Figure S4.** Atomic force micrographs and normalized UV-visible absorption spectra of ITO electrodes (black lines) modified with (A) poly-trans-H<sub>2</sub>Py<sub>2</sub>Ph<sub>2</sub>P-ZnOEP, (B) poly-trans-H<sub>2</sub>Py<sub>2</sub>Ph<sub>2</sub>P-ZnOEP(Cl)<sub>2</sub>, (C) poly-H<sub>2</sub>Py<sub>3</sub>PhP-ZnOEP and (D) poly-H<sub>2</sub>Py<sub>4</sub>P-ZnOEP (red lines: absorption spectra of the monomers ZnOEP or ZnOEP(Cl)<sub>2</sub> according to the copolymer (in 1,2-C<sub>2</sub>H<sub>4</sub>Cl<sub>2</sub>) and blue lines: absorption spectra of the pendant pyridyl porphyrin monomers used for each copolymer (in 1,2-C<sub>2</sub>H<sub>4</sub>Cl<sub>2</sub>)).
